# Supplementary material for: Lazerckerite, Ag3.75Pb4.5(Sb7.75Bi4)S24, from Kutná Hora, Czech Republic: a new Sb–Bi member of the andorite branch of the lillianite homologous series
Source: Copernicus journal article supplement (doi:10.5194/ejm-36-641-2024), 2024-08-28
Supplement: Supplementary file 1 [file LAZERCKERITE_checkcif_Validation reply form.doc]

Validation response form

# start Validation Reply Form
_vrf_PLAT213_I
;
PROBLEM: Atom Ag10 has ADP max/min Ratio ..... 7.4 oblate
RESPONSE: The sample was an extremely small weakly diffracting specimen with not very good-quality reflections. It was composed of heavy elements, the absorption coefficient was 42 mm**-1. Refinement results correspond with these facts. Unharmonicity of silver may also play role.
;
_vrf_PLAT924_I
;
PROBLEM: The Reported and Calculated Rho(min) Differ by . 12.39 eA-3
RESPONSE: The structure is a merohedral twin. Platon can read the fcf file but cannot interpret merohedral twinning and calculates different values of R factors, GOF and difference Fourier maxima than in the cif file from Jana. This problem was encountered also by other programs.

Large residua are probably caused by the small number of observed reflections, presence of heavy elements and lower data quality resulting from the character of the sample.

;
_vrf_PLAT925_I
;
PROBLEM: The Reported and Calculated Rho(max) Differ by . 11.21 eA-3
RESPONSE: The structure is a merohedral twin. Platon can read the fcf file but cannot interpret merohedral twinning and calculates different values of R factors, GOF and difference Fourier maxima than in the cif file from Jana. This problem was encountered also by other programs.;
_vrf_PLAT926_I
;
PROBLEM: Reported and Calculated R1 Differ by ......... -0.0889 Check
RESPONSE: The structure is a merohedral twin. Platon can read the fcf file but cannot interpret merohedral twinning and calculates different values of R factors, GOF and difference Fourier maxima than in the cif file from Jana. This problem was encountered also by other programs.

Large residua are probably caused by the small number of observed reflections, presence of heavy elements and lower data quality resulting from the character of the sample.

;
_vrf_PLAT927_I
;
PROBLEM: Reported and Calculated wR2 Differ by ......... -0.1461 Check
RESPONSE: The structure is a merohedral twin. Platon can read the fcf file but cannot interpret merohedral twinning and calculates different values of R factors, GOF and difference Fourier maxima than in the cif file from Jana. This problem was encountered also by other programs.
;
_vrf_PLAT934_I
;
PROBLEM: Number of (Iobs-Icalc)/Sigma(W) > 10 Outliers .. 15 Check
RESPONSE: The sample was an extremely small weakly diffracting specimen with not very good quality reflections. It was composed of heavy elements, the absorption coefficient was 42 mm**-1. Refinement results correspond with these facts.
;
_vrf_PLAT971_I
;
PROBLEM: Check Calcd Resid. Dens. 0.42Ang From Pb1 14.88 eA-3
RESPONSE: These “false peaks”, so called “ghosts”, do appear often near heavy atoms (usually in the distance up to 0.5 A from the atom) in the cases of single crystal samples which:

a) are very small

b) are composed of heavy elements and as a result have a high absorption

c) no matter how long you expose, the diffraction data are of limited (lower) quality, caused by a) and b), resulting in high Rint

Researchers who do structures of rare heavy sulfosalts extracted from small grains in polished section know this fact and apply different criteria compared to structures of minerals with larger crystals and smaller absorption, where obtaining better-quality diffraction data is possible.

Nevertheless, we are positive that the structure is correct, which is also supported by:

1) the ability to find by refinement a structural formula close to microprobe composition

2) Charge density calculations carried out in program ECON

The character of the mineral as is seen in BSE protographs does not allow or facilitate a better sample or crystal, which would enable to obtain better-quality diffraction data.

However, we think that the data are sufficient and the structure is correct.

;
_vrf_PLAT972_I
;
PROBLEM: Check Calcd Resid. Dens. 0.62Ang From Pb1 -15.50 eA-3
RESPONSE: ...
;
_vrf_PLAT928_I
;
PROBLEM: Reported and Calculated S value Differ by . -1.485 Check
RESPONSE: ...
;
# end Validation Reply Form
PLATON version of 18/05/2022; check.def file version of 17/05/2022
