# Supplementary material for: Lazerckerite, Ag3.75Pb4.5(Sb7.75Bi4)S24, from Kutná Hora, Czech Republic: a new Sb–Bi member of the andorite branch of the lillianite homologous series
Source: Copernicus journal article supplement (doi:10.5194/ejm-36-641-2024), 2024-08-28
Supplement: Supplementary file [file ejm-36-641-2024-supplement-title-page.pdf › ejm-36-641-2024-supplement-title-page.pdf]

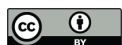

*Supplement of*

**Lazerckerite,  $\text{Ag}_{3.75}\text{Pb}_{4.5}(\text{Sb}_{7.75}\text{Bi}_4)\text{S}_{24}$ , from Kutná Hora, Czech Republic: a new Sb–Bi member of the andorite branch of the lillianite homologous series**

**Richard Pažout et al.**

*Correspondence to:* Richard Pažout ([richard.pazout@vscht.cz](mailto:richard.pazout@vscht.cz))

- [ejm-36-641-2024-supplement-title-page.pdf](#)
- [2022-113\\_LAZERCKERITE\\_ALett.pdf](#)
- [LAZERCKERITE\\_checkcif\\_Validation reply form.doc](#)
- [Lazerckerite.cif](#)
- [Lazerckerite.fcf](#)

The copyright of individual parts of the supplement might differ from the article licence.
